# Supplementary material for: The Cloud Feedback Model Intercomparison Project (CFMIP) contribution to CMIP7
Source: Copernicus journal article supplement (doi:10.5194/egusphere-2026-398), 2026-01-29
Supplement: Supplementary file [file egusphere-2026-398-AC4-supplement.pdf]

### **Executive editor comment**

In the Data Availability section of your manuscript, you have included a misleading statement regarding the availability of data for two experiments. The Data Availability section must contain information regarding the data used to produce the work presented. Your manuscript describes an experiment; however, it does not present the results of data or have made use of datasets. Also, you have not included a Code Availability section in the manuscript. Therefore, you should rename the Data Availability section as "Code and Data Availability" and it should read "No code or data has been used or is necessary to replicate the work here presented."

Thanks for pointing this out. We will make the changes as requested, and move any data links to the main text.
